# Supplementary material
Source: Springer Nature journal article supplement (https://www.springermedizin.de/resource/supplementary/12865_2005_81_MOESM4_ESM.pdf/9428468)

## Log:Log Regression Analysis of qPCR on OT-1 DNA Diluted into WT C57BL/6 DNA

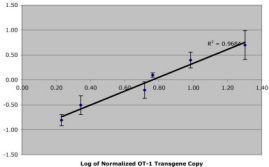

Supplement: MOESM4 [file 9428468]
